# Supplementary material for: Conducting cross-cultural, multi-lingual or multi-country scale development and validation in health care research: A 10-step framework based on a scoping review
Source: PubMed Central journal article supplement (PMC11257704; doi:10.7189/jogh.14.04151), 2024-07-19
Supplement: jogh-14-04151-s001.pdf [file jogh-14-04151-s001.pdf]

## Appendix S1. Search strategy

Database(s): Embase 1974 to present, Medline (Ovid MEDLINE® Epub Ahead of Print, In-Process & Other Non-Indexed Citations, Ovid MEDLINE® Daily and Ovid MEDLINE®) 1946 to present, PsycINFO 1806 to present

Search Strategy:

| # | Searches                                                                                                                                                                                                                                                                     | Results |
|---|------------------------------------------------------------------------------------------------------------------------------------------------------------------------------------------------------------------------------------------------------------------------------|---------|
| 1 | (scale* or index* or tool* or instrument*).ti.                                                                                                                                                                                                                               | 908523  |
| 2 | (develop* or valid*).ti.                                                                                                                                                                                                                                                     | 2073973 |
| 3 | ("multilanguage" or "multi-language" or "multicountry" or "multi-country" or "multigroup" or "multi-group" or "cross language" or "cross-language" or "cross country" or "cross-country" or "cross cultur*" or "cross-cultur*" or "across cultur*" or "across setting*").tw. | 115450  |
| 4 | 1 and 2 and 3                                                                                                                                                                                                                                                                | 4667    |
| 5 | limit 4 to (english language and yr="2010 - 2022")                                                                                                                                                                                                                           | 3683    |
| 6 | remove duplicates from 5                                                                                                                                                                                                                                                     | 1985    |

## Appendix S2. PRISMA Diagram

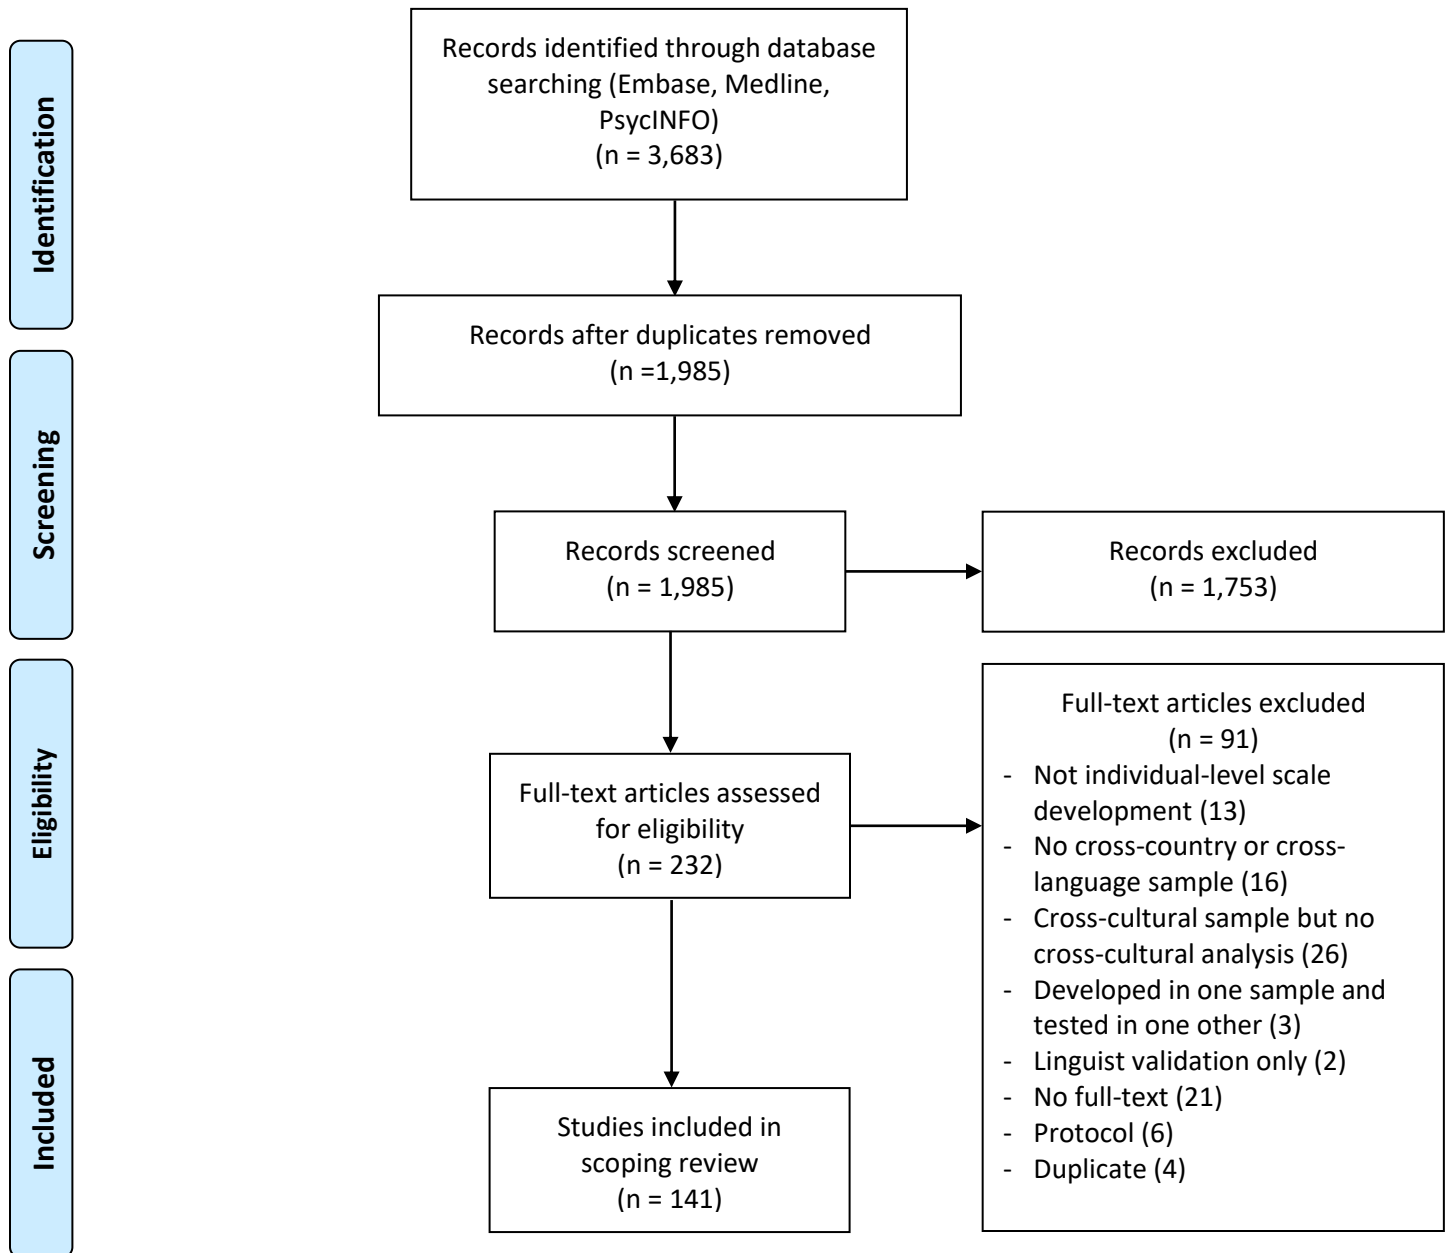

Appendix S3. Detail of included studies

| First author      | title                                                                                                                                                             | journal                                                                       | Item development | Technique used                                                                | Scale development | Technique used                                 | Translation                | Scale validation | Technique used                                                | Country number | Language number | Survey sample size |
|-------------------|-------------------------------------------------------------------------------------------------------------------------------------------------------------------|-------------------------------------------------------------------------------|------------------|-------------------------------------------------------------------------------|-------------------|------------------------------------------------|----------------------------|------------------|---------------------------------------------------------------|----------------|-----------------|--------------------|
| Benschop A.       | Why do people use new psychoactive substances? Development of a new measurement tool in six European countries                                                    | J. Psychopharmacol.                                                           | X                | Research on policy and context in each country; Expert consultation           | X                 | Different way of recruitment in each country   | Back and forth translation | X                | MGCFA                                                         | 6              | 6               | 3023               |
| Heckert J.        | Development and validation of a health and nutrition module for the project-level Women's Empowerment in Agriculture Index (pro-WEAI+HN)                          | Matern Child Nutr                                                             | X                |                                                                               | X                 |                                                |                            | X                | MGCFA                                                         | 3              | N/A             | 12114              |
| Taris, Toon W     | Going your own way: A cross-cultural validation of the Motivational Demands at Work Scale (mind@work).                                                            | Frontiers in Psychology                                                       |                  |                                                                               |                   |                                                | Back and forth translation | X                | MGCFA                                                         | 2              | 2               | 989                |
| O'Brien, Karen M  | The Good Mothering Expectations Scale: An international instrument development study.                                                                             | The Counseling Psychologist                                                   | X                | Review to capture constructs; multi-cultural research team member             | X                 | Separate EFA and CFA; Difference in incentives | Back and forth translation |                  |                                                               | 2              | 2               | 1238               |
| Wilson C.A..      | A cross-cultural validation of the Resiliency Scale for Young Adults in Canada and China                                                                          | Psych J                                                                       |                  |                                                                               |                   |                                                | Expert review translation  | X                | MGCFA                                                         | 2              | 2               | 1268               |
| Datu J.A.D.       | Psychometric validity and measurement invariance of the caring for Bliss Scale in the Philippines and the United States                                           | J Am Coll Health                                                              |                  |                                                                               |                   |                                                |                            | X                | MGCFA                                                         | 2              | 1               | 1189               |
| Lawson, Jessica L | Cross cultural validation of the Yale Food Addiction Scale 2.0 and evaluation of food addiction in Hispanic bariatric surgery-seeking patients.                   | Dissertation Abstracts International: Section B: The Sciences and Engineering |                  |                                                                               |                   |                                                | Back and forth translation | X                | MGCFA                                                         | 1              | 1               | 444                |
| Roberts M.E.      | Testing the Situationism Scale in Europe: Scale validation, self-regulation and regional differences                                                              | Int J Psychol                                                                 |                  |                                                                               |                   |                                                | Back and forth translation | X                | MGCFA                                                         | 23             | 6               | 1106               |
| Walker, Timothy J | Examining the validity, reliability, and measurement invariance of the Social Support for Exercise Scale among Spanish- and English-language Hispanics.           | Hispanic Journal of Behavioral Sciences                                       |                  |                                                                               |                   |                                                | Back and forth translation | X                | MGCFA                                                         | 1              | 2               | 1447               |
| Aizpitarte A      | Development of a Dating Violence Assessment Tool for Late Adolescence Across Three Countries: The Violence in Adolescents' Dating Relationships Inventory (VADRI) | J Interpers Violence                                                          | X                | Interviews and FGD to generate items; response considering country difference | X                 | Cognitive interview                            |                            | X                | differential item functioning (DIF) using multiple regression | 3              | 1               | 466                |
| Wanstrom, Linda   | Perceived collective efficacy to stop aggression at school: A validation of an Italian and a Swedish version of a scale for adolescents.                          | European Journal of Developmental Psychology                                  |                  |                                                                               |                   |                                                | Back and forth translation | X                | MGCFA                                                         | 2              | 2               | 678                |
| Kahn, Dennis T    | Measuring parental anchoring: The development and validation of the Parental Anchoring Scale.                                                                     | TPM-Testing, Psychometrics, Methodology in Applied Psychology                 |                  |                                                                               |                   |                                                | Back and forth translation | X                | MGCFA                                                         | 2              | 2               | 472                |
| Perkmen, Serkan   | Cross-cultural search for Big Five: Development of a scale to compare personality traits of pre-service elementary school teachers in Turkey and Spain.           | Asia Pacific Education Review                                                 | X                | Review to capture similar scales in each language and culture                 | X                 | Separate PCA and CFA in each language          |                            |                  |                                                               | 2              | 2               | 555                |
| Schnettler, Berta | Cross-cultural measurement invariance in the Satisfaction with Food-Related Life Scale in older adults from two developing countries.                             | Health and Quality of Life Outcomes                                           |                  |                                                                               |                   |                                                |                            | X                | MGCFA                                                         | 2              | 1               | 1573               |
| Monaco E.         | Cross-cultural validation of the Worries about COVID-19 and its consequences Scale (W-COV) in adolescents and young people                                        | Arch Psychiatr Nurs                                                           |                  |                                                                               |                   |                                                |                            | X                | MGCFA                                                         | 5              | 1               | 5559               |

|                           |                                                                                                                                                                                                       |                                                                            |   |                                                                                                                                   |   |                                       |                                                   |   |                                                           |     |     |      |
|---------------------------|-------------------------------------------------------------------------------------------------------------------------------------------------------------------------------------------------------|----------------------------------------------------------------------------|---|-----------------------------------------------------------------------------------------------------------------------------------|---|---------------------------------------|---------------------------------------------------|---|-----------------------------------------------------------|-----|-----|------|
| Hakim, Moh Abdul          | Development, construct validity, and measurement invariance of the Parasocial Relationship with Political Figures (PSR-P) Scale.                                                                      | International Perspectives in Psychology: Research, Practice, Consultation |   |                                                                                                                                   |   |                                       | Committee approach                                | X | Satorra-Bentler $\chi^2$ (SB - $\chi^2$ ) difference test | 3   | 2   | 1399 |
| Erhart M.                 | A comparison of Rasch item-fit and Cronbach's alpha item reduction analysis for the development of a Quality of Life scale for children and adolescents                                               | Child Care Health Dev                                                      |   |                                                                                                                                   |   |                                       |                                                   | X | DIF                                                       | 7   | 1   | 3019 |
| Brunet J.                 | Measurement invariance of English and French Health Education Impact Questionnaire (heiQ) empowerment scales validated for cancer                                                                     | Qual. Life Res.                                                            |   |                                                                                                                                   |   |                                       | Hawkins and Osborne                               | X | MGCFA                                                     | 2   | 2   | 1224 |
| Ruvio, Ayalla A           | Consumer arrogance: Scale development and validation.                                                                                                                                                 | Journal of Business Research                                               |   |                                                                                                                                   |   |                                       |                                                   | X | MGCFA and nomological model (SEM)                         | 2   | 1   | 347  |
| Abraham L.                | Qualitative cross-cultural exploration of breast symptoms and impacts associated with hormonal treatments for menopausal symptoms to inform the development of new patient-reported measurement tools | Maturitas                                                                  | X | Interview and open-end questioning/concept elicitation interviews; input from measurement experts, clinical experts and linguists |   |                                       |                                                   |   |                                                           | 4   | 4   | 59   |
| Gagne, Marylene           | The Multidimensional Work Motivation Scale: Validation evidence in seven languages and nine countries.                                                                                                | European Journal of Work and Organizational Psychology                     | X |                                                                                                                                   | X |                                       | Back and forth translation                        | X | MGCFA                                                     | 9   | 7   | 3435 |
| Littrell, Romie Frederick | Explicit preferred leader behaviours across cultures: Instrument development and validation.                                                                                                          | Journal of Management Development                                          |   |                                                                                                                                   | X | Separate SEM in each country          | Brislin                                           |   |                                                           | 16+ | 10  | N/A  |
| Kerrigan D.               | Development of the Experiences of Sex Work Stigma Scale Using Item Response Theory: Implications for Research on the Social Determinants of HIV                                                       | AIDS Behav                                                                 | X | In-depth interview                                                                                                                | X | Cognitive debriefing interviews       |                                                   | X | DIF                                                       | 2   | 2   | 416  |
| McCoy, Dana Charles       | Measuring early childhood development at a global scale: Evidence from the Caregiver-Reported Early Development Instruments.                                                                          | Early Childhood Research Quarterly                                         | X | Review of tools                                                                                                                   | X | Cognitive interview                   | Back and forth translation                        |   |                                                           | 17  | N/A | 8022 |
| Mccusker P.J.             | International cross-cultural validation study of the Canadian Haemophilia Outcomes: Kids' Life Assessment Tool                                                                                        | Haemophilia                                                                |   |                                                                                                                                   | X | Cognitive debriefing interview        | Back and forth translation, expert review         |   |                                                           | 5   | 5   | 265  |
| Admi H.                   | Stress measurement among charge nurses: developing a cross-cultural tool                                                                                                                              | J Adv Nurs                                                                 |   |                                                                                                                                   | X | Separate CFA                          |                                                   |   |                                                           | 3   | 3   | 2616 |
| Martin-Fernandez, Manuel  | Refinement of the Analysis-Holism Scale: A cross-cultural adaptation and validation of two shortened measures of analytic versus holistic thinking in Spain and the United States.                    | Personality and Individual Differences                                     |   |                                                                                                                                   | X | Cross-cultural expert review of items | Back and forth translation, expert review         | X | MGCFA                                                     | 2   | 2   | 2254 |
| Oort Q.                   | Development of an EORTC questionnaire measuring instrumental activities of daily living (IADL) in patients with brain tumours: Phase I-III                                                            | Neuro-Oncology                                                             | X | literature review                                                                                                                 | X | Cognitive debriefing                  | EORTC Quality of Life Group Translation Procedure |   |                                                           | 5   | 5   | 129  |
| Metin, U. Baran           | Validation of the Procrastination at Work Scale: A seven-language study.                                                                                                                              | European Journal of Psychological Assessment                               |   |                                                                                                                                   |   |                                       | Back and forth translation                        | X | MGCFA                                                     | 7   | 7   | 1028 |
| Caqueo-Urizar, Alejandra  | Validation of the GEOPTE scale of social cognition for psychosis in patients diagnosed with schizophrenia in Latin America.                                                                           | Behavioral Psychology                                                      |   |                                                                                                                                   |   |                                       |                                                   | X | MGCFA                                                     | 3   | 1   | 253  |
| Mourao, Luciana           | Professional development short scale: Measurement invariance, stability, and validity in Brazil and Angola.                                                                                           | Front Psychol                                                              |   |                                                                                                                                   |   |                                       | Borsa                                             | X | MGCFA                                                     | 2   | 1   | 2547 |

|                    |                                                                                                                                                                                        |                                      |   |                                                           |   |                               |                                                                  |   |                                               |     |   |      |
|--------------------|----------------------------------------------------------------------------------------------------------------------------------------------------------------------------------------|--------------------------------------|---|-----------------------------------------------------------|---|-------------------------------|------------------------------------------------------------------|---|-----------------------------------------------|-----|---|------|
| Leger R.R.         | Stigma in adults with sickle cell disease and family members: Scale development and pilot study in the USA and Nigeria                                                                 | Int. J. Afr. Nurs. Sci.              | X | Individual check cultural competency and content validity |   |                               |                                                                  |   |                                               | 2   | 1 | 42   |
| Cid, Luis          | Cross-cultural validation of the Basic Psychological Needs in Physical Education Scale between Portugal and Brazil samples.                                                            | The Spanish Journal of Psychology    |   |                                                           |   |                               |                                                                  | X | MGCFA                                         | 2   | 1 | 1066 |
| Arana F.G.         | Cross-Cultural Validity of the Ruminative Responses Scale in Argentina and the United States                                                                                           | Assessment                           |   |                                                           |   |                               |                                                                  | X | Nested model comparison                       | 2   | 2 | 679  |
| Rahafar A.         | Cross-cultural validity of Morningness-Eveningness Stability Scale improved (MESSi) in Iran, Spain and Germany                                                                         | Chronobiol. Int.                     |   |                                                           |   |                               | Back and forth translation                                       | X | MGCFA                                         | 3   | 3 | 716  |
| Bothe B.           | The development of the Compulsive Sexual Behavior Disorder Scale (CSBD-19): An ICD-11 based screening measure across three languages                                                   | J. Behav. Addict.                    |   |                                                           | X | Separate CFA                  | Back and forth translation                                       | X | MGCFA                                         | 3   | 3 | 9375 |
| Velten, Julia      | Positive Mental Health Scale: Validation and measurement invariance across eight countries, genders, and age groups.                                                                   | Psychological Assessment             |   |                                                           |   |                               |                                                                  | X | Procedure described by Svetina et al. (2020). | 8   | 6 | 8302 |
| Encantado J.       | Development and cross-cultural validation of the Goal Content for Weight Maintenance Scale (GCWMS)                                                                                     | Eating Weight Disord.                |   |                                                           | X | Separate CFA                  | Back and forth translation, expert review                        | X | likelihood ratio test                         | 3   | 3 | 1511 |
| Luquiens A.        | Development of the Alcohol Quality of Life Scale (AQoLS): a new patient-reported outcome measure to assess health-related quality of life in alcohol use disorder                      | Qual. Life Res.                      | X | Concept elicitation focus groups; expert review           | X | Cognitive interview           |                                                                  |   |                                               | 2   | 1 | 38   |
| Gibbons, Robert D  | Successful validation of the CAT-MH Scales in a sample of Latin American migrants in the United States and Spain.                                                                      | Psychological Assessment             |   |                                                           |   |                               | Matías-Carrelo et al., 2003                                      | X | DIF                                           | 2   | 2 | 2074 |
| Louis J.P.         | Psychometric validation of the Young Parenting Inventory - Revised (YPI-R2): Replication and Extension of a commonly used parenting scale in Schema Therapy (ST) research and practice | PLoS ONE                             |   |                                                           |   |                               |                                                                  | X | MGCFA                                         | 4   | 1 | 3074 |
| Joshanloo, Mohsen  | Cross-cultural validation of fear of happiness scale across 14 national groups.                                                                                                        | Journal of Cross-Cultural Psychology |   |                                                           |   |                               | Back and forth translation                                       | X | MGCFA                                         | 14  | 6 | 2398 |
| Von Steinbuchel N. | Quality of life after brain injury (QOLIBRI): Scale development and metric properties                                                                                                  | J. Neurotrauma                       | X | consensus meetings of an international consortium         | X | separate internal reliability | Acquadro et al., 1996).                                          |   |                                               | 9   | 6 | 2449 |
| del Libano, Mario  | Validity of a brief workaholism scale.                                                                                                                                                 | Psicothema                           |   |                                                           |   |                               |                                                                  | X | MGCFA                                         | 2   | 2 | 2714 |
| Rye M.             | The Evidence-based Practice Attitude Scale-36 (EBPAS-36): a brief and pragmatic measure of attitudes to evidence-based practice validated in US and Norwegian samples                  | Implement Sci                        |   |                                                           | X | Separate CFA                  | Back and forth translation                                       |   |                                               | 2   | 2 | 1256 |
| Figueroa R.        | The Obesity Parenting Intervention Scale: Factorial Validity and Invariance Among Head Start Parents                                                                                   | Am. J. Prev. Med.                    |   |                                                           |   |                               | team consensus                                                   | X | MGCFA                                         | N/A | 2 | 578  |
| Llosa A.E.         | Development of a patient rated scale for mental health global state for use during humanitarian interventions                                                                          | Int J Methods Psychiatr Res          | X | Consensus group and community focus group                 | X | Separate PCA in each language | Back and forth translation                                       |   |                                               | 2   | 2 | 158  |
| Kueh Y.C.          | Cross-cultural validation of the decisional balance scale in exercise across countries                                                                                                 | PLoS ONE                             |   |                                                           |   |                               |                                                                  | X | Byrne guideline                               | 2   | 2 | 1136 |
| Sproesser, Gudrun  | The Positive Eating Scale: Relationship with objective health parameters and validity in Germany, the USA and India.                                                                   | Psychology & Health                  |   |                                                           | X | Separate CFA                  | Douglas and Craig 2007 collaborative and interactive translation |   |                                               | 3   | 3 | 749  |

|                      |                                                                                                                                                          |                                                                               |   |                        |   |                                        |                                            |   |                                                                             |    |     |       |
|----------------------|----------------------------------------------------------------------------------------------------------------------------------------------------------|-------------------------------------------------------------------------------|---|------------------------|---|----------------------------------------|--------------------------------------------|---|-----------------------------------------------------------------------------|----|-----|-------|
| Lieven, Theo         | Global validation of the Coronavirus Anxiety Scale (CAS).                                                                                                | Curr Psychol                                                                  |   |                        |   |                                        | Back and forth translation                 | X | MGCFA                                                                       | 25 | 15  | 10232 |
| Fujino Y.            | Cross-cultural validation of the work functioning impairment scale (WFun) among Japanese, English, and Chinese versions using Rasch analysis             | J Occup Health                                                                |   |                        |   |                                        |                                            | X | Differential item functioning (DIF) and differential test functioning (DTF) | 3  | 3   | 1700  |
| Wang K.T.            | The Cross-Cultural Loss Scale: development and psychometric evaluation                                                                                   | Psychol Assess                                                                | X | Individual interview   |   |                                        |                                            |   |                                                                             | 1  | 1   | 262   |
| Rocheftort C.        | Evaluating the Validity of the Risk Perception Survey for Developing Diabetes Scale in a Safety-Net Clinic Population of English and Spanish Speakers    | Diabetes Educ                                                                 |   |                        |   |                                        | Bilingual staff review                     | X | MGCFA                                                                       | 1  | 2   | 641   |
| Pacheco, Paola Ochoa | The Working Conditions Questionnaire: Cross-cultural validation and scale refinement in six Ibero-American countries.                                    | Employee Relations                                                            |   |                        |   |                                        |                                            | X | MGCFA                                                                       | 6  | 1   | 7404  |
| Lopez-Fernandez O.   | Cross-Cultural Validation of the Compulsive Internet Use Scale in Four Forms and Eight Languages                                                         | Cyberpsychol Behav Soc Netw                                                   |   |                        |   |                                        | Back and forth translation                 | X | MGCFA                                                                       | 15 | 8   | 4226  |
| Vecchione, Michele   | The Perceived Political Self-Efficacy Scale-Short Form (PPSE-S): A validation study in three Mediterranean countries.                                    | Cross-Cultural Research: The Journal of Comparative Social Science            |   |                        |   |                                        | Back and forth translation                 | X | MGCFA                                                                       | 3  | 3   | 1321  |
| Stevellink S.A.      | Development and structural validation of a shortened version of the Participation Scale                                                                  | Disabil Rehabil                                                               |   |                        | X | Separate EFA and CFA for each dataset  |                                            |   |                                                                             | 6  | 6   | 5125  |
| Hepperlen R.A.       | Evaluating the cross-cultural validity of three family quality of life sub-scales                                                                        | J Appl Res Intellect Disabil                                                  |   |                        |   |                                        |                                            | X | DIF                                                                         | 2  | N/A | 1444  |
| Cengiz H.            | Death-Related Status Consumption: Scale Development and Validation                                                                                       | Omega (Westport)                                                              |   |                        | X | Separate CFA                           |                                            |   |                                                                             | 2  | 1   | 1302  |
| Chen P.-Y.           | Validating the cross-cultural factor structure and invariance property of the Insomnia Severity Index: Evidence based on ordinal EFA and CFA             | Sleep Med.                                                                    |   |                        |   |                                        |                                            | X | MGCFA                                                                       | 3  | 2   | 2820  |
| Romera, Eva M        | How much do adolescents cybergossip? Scale development and validation in Spain and Colombia.                                                             | Frontiers in Psychology                                                       |   |                        |   |                                        |                                            | X | MGCFA                                                                       | 2  | 1   | 3747  |
| Zhou, Xiang          | Construction and cross-cultural validation of parenting regulatory focus scale.                                                                          | Dissertation Abstracts International: Section B: The Sciences and Engineering |   |                        |   |                                        | Brislin                                    | X | MGCFA                                                                       | 2  | 2   | 853   |
| Boivin J.            | The fertility quality of life (FertiQoL) tool: Development and general psychometric properties                                                           | Hum. Reprod.                                                                  | X | Focus group            |   |                                        | Back and forth translation                 |   |                                                                             | 10 | 20  | 525   |
| Egolf A.             | Cross-cultural validation of the short version of the Food Disgust Scale in ten countries                                                                | Appetite                                                                      |   |                        |   |                                        | Back and forth translation                 | X | MGCFA                                                                       | 10 | 5   | 6128  |
| Michaud, James       | Development and validation of the Leadership Effectiveness in Africa and the Diaspora (LEAD) Scale.                                                      | International Journal of Cross Cultural Management                            | X | Delphi and focus group | X | Measurement refinement in each setting |                                            | X | MGCFA                                                                       | 19 | 1   | 1384  |
| Ndosi M.             | Cross-cultural validation of the Educational Needs Assessment Tool in RA in 7 European countries                                                         | BMC Musculoskelet. Disord.                                                    |   |                        |   |                                        | Beaton's cross-cultural adaptation process | X | Rasch analysis and DIF                                                      | 7  | 7   | 1042  |
| Knoll, Michael       | International differences in employee silence motives: Scale validation, prevalence, and relationships with culture characteristics across 33 countries. | Journal of Organizational Behavior                                            |   |                        |   |                                        | Brislin                                    | X | MGCFA                                                                       | 33 | 21  | 8222  |

|                                  |                                                                                                                                                                                                                      |                                                          |   |                                                  |   |                     |                                           |   |                                                  |    |     |       |
|----------------------------------|----------------------------------------------------------------------------------------------------------------------------------------------------------------------------------------------------------------------|----------------------------------------------------------|---|--------------------------------------------------|---|---------------------|-------------------------------------------|---|--------------------------------------------------|----|-----|-------|
| Vogel, David L                   | Cross-cultural validation of the Perceptions of Stigmatization by Others for Seeking Help (PSOSH) Scale.                                                                                                             | Stigma and Health                                        |   |                                                  |   |                     | Back and forth translation                | X | sequential constraint imposition approach        | 11 | N/A | 3440  |
| Lau, Chloe                       | Measuring Italian resilience: Cross-cultural validity and psychometric properties of the Essential Resilience Scale in Italian and Canadian contexts.                                                                | European Journal of Psychological Assessment             |   |                                                  |   |                     | standardized test translation procedures  | X | MGCFA                                            | 2  | 2   | 1394  |
| Schlosser, Oliver                | Humane orientation as a new cultural dimension of the GLOBE project: A validation study of the GLOBE Scale and out-group humane orientation in 25 countries.                                                         | Journal of Cross-Cultural Psychology                     |   |                                                  | X | Separate CFA        | Brislin                                   |   |                                                  | 25 | N/A | 876   |
| Olafsen, Anja Hagen              | The Basic Psychological Need Satisfaction and Need Frustration at Work Scale: A Validation Study.                                                                                                                    | Front Psychol                                            |   |                                                  |   |                     | Brislin                                   | X | MGCFA                                            | 2  | 2   | 1432  |
| Gille, Vera                      | Stress-symptoms and well-being in children and adolescents: Factor structure, measurement invariance, and validity of English, French, German, Russian, Spanish, and Ukrainian language versions of the SSKJ scales. | Health Psychology and Behavioral Medicine                |   |                                                  | X | Separate CFA        | Back and forth translation                | X | MGCFA                                            | 10 | 6   | 5227  |
| Luengo Kanacri, Bernadette Paula | Measuring Prosocial Behaviors: Psychometric Properties and Cross-National Validation of the Prosociality Scale in Five Countries.                                                                                    | Front Psychol                                            |   |                                                  | X | Separate CFA        | Back and forth translation                | X | MGCFA                                            | 5  | 5   | 1630  |
| Wambogo E.A.                     | Validity of the Food Insecurity Experience Scale (FIES) for use in Sub-Saharan Africa (SSA)                                                                                                                          | FASEB J.                                                 |   |                                                  |   |                     |                                           | X | Rasch analysis                                   | 36 | N/A | 57792 |
| Zheng, Xiaoming                  | Employee well-being in organizations: Theoretical model, scale development, and cross-cultural validation.                                                                                                           | Journal of Organizational Behavior                       |   |                                                  |   |                     |                                           | X | MGCFA                                            | 2  | N/A | 674   |
| Tze, Virginia M. C               | A cross-cultural validation of the Learning-Related Boredom Scale (LRBS) with Canadian and Chinese college students.                                                                                                 | Journal of Psychoeducational Assessment                  |   |                                                  |   |                     | Back and forth translation                | X | MGCFA                                            | 2  | 2   | 405   |
| Pendergast L.L.                  | Assessing development across cultures: Invariance of the Bayley-III Scales Across Seven International MAL-ED sites                                                                                                   | Sch Psychol Q                                            |   |                                                  |   |                     | Back and forth translation, expert review | X | multiple indicator multiple causes (MIMIC)       | 8  | 8   | 1867  |
| Pendergast, Laura L              | Approach temperament across cultures: Validity of the Infant Temperament Scale in MAL-ED.                                                                                                                            | International Journal of School & Educational Psychology |   |                                                  |   |                     | Back and forth translation                | X | multiple indicator multiple causes (MIMIC) + DIF | 8  | 8   | 1933  |
| Hong, Philip Young P             | A cross-national validation of the Short Employment Hope Scale (EHS-14) in the United States and South Korea.                                                                                                        | Social Work Research                                     |   |                                                  |   |                     | Back and forth translation                | X | MGCFA                                            | 2  | 2   | 848   |
| Spagnoli, Paola                  | Factorial validity, cross-cultural equivalence, and latent means examination of the Organizational Career Growth scale in Italy and China.                                                                           | The International Journal of Human Resource Management   |   |                                                  |   |                     | Back and forth translation                | X | MGCFA                                            | 2  | 2   | 1138  |
| Spagnoli, Paola                  | A contribution toward the adaptation and validation of the entrepreneurial self-efficacy scale in Italy and Portugal.                                                                                                | Journal of Career Assessment                             |   |                                                  |   |                     | Back and forth translation                | X | MGCFA                                            | 2  | 2   | 815   |
| Young S.L.                       | The Individual Water Insecurity Experiences (IWISE) Scale: Reliability, equivalence and validity of an individual-level measure of water security                                                                    | BMJ Glob. Health                                         | X | Adaptation from a relevant work that have review | X | Cognitive interview | Translator review of translation          | X | MGCFA; Criterion validity                        | 31 | 59  | 43970 |
| Gilworth G.                      | Adaptation and cross-cultural validation of the RA-WIS (Work Instability Scale) (Annals of the Rheumatic Diseases (2009) 68, (1686-1690))                                                                            | Ann. Rheum. Dis.                                         |   |                                                  |   |                     | Back and forth translation, expert review | X | Rasch analysis and DIF                           | 4  | 4   | 306   |

|                      |                                                                                                                                                                                                           |                                                 |   |                                                    |   |              |                                           |   |                                                   |     |     |        |
|----------------------|-----------------------------------------------------------------------------------------------------------------------------------------------------------------------------------------------------------|-------------------------------------------------|---|----------------------------------------------------|---|--------------|-------------------------------------------|---|---------------------------------------------------|-----|-----|--------|
| Vogel D.L.           | Cross-cultural validity of the self-stigma of seeking help (SSOSH) scale: Examination across six nations                                                                                                  | J. Couns. Psychol.                              |   |                                                    |   |              | Back and forth translation, expert review | X | MGCFA (sequential constraint imposition approach) | 6   | 5   | 3585   |
| Smolenski D.J.       | Revision, criterion validity, and multigroup assessment of the reactions to homosexuality scale                                                                                                           | J Pers Assess                                   |   |                                                    |   |              |                                           | X | Nested model comparison                           | N/A | 2   | 3125   |
| Lorenz, Timo         | Validation of the revised Compound PsyCap Scale (CPC-12R) and its measurement invariance across the US and Germany.                                                                                       | Front Psychol                                   |   |                                                    |   |              |                                           | X | MGCFA                                             | 2   | 2   | 587    |
| Boudjemadi, Valerian | Assessing the cross-cultural validity of the Succession, Identity and Consumption (SIC) Scale across four French-speaking countries.                                                                      | International Review of Social Psychology       |   |                                                    |   |              |                                           | X | MGCFA and MIMIC                                   | 4   | 1   | 1827   |
| Geyh S.              | Cross-cultural validity of four quality of life scales in persons with spinal cord injury                                                                                                                 | Health Qual. Life Outcomes                      |   |                                                    |   |              |                                           | X | DIF                                               | 6   | 3   | 243    |
| Dinic, Bojana M      | Cross-cultural comparison of the Benign and Malicious Envy Scale (BeMaS) across Serbian and US samples and further validation.                                                                            | European Journal of Psychological Assessment    |   |                                                    |   |              |                                           | X | DIF                                               | 2   | 1   | 417    |
| Lau, Chloe           | How essential is the essential resilience scale? Differential item functioning of Chinese and English versions and criterion validity.                                                                    | Personality and Individual Differences          |   |                                                    |   |              |                                           | X | DIF                                               | 2   | 2   | 753    |
| Suhonen R.           | Cross-cultural validity of the Individualised Care Scale - A Rasch model analysis                                                                                                                         | J. Clin. Nurs.                                  |   |                                                    |   |              |                                           | X | Rasch analysis                                    | 3   | N/A | 1093   |
| Tran H.              | Structural Validation and Multiple Group Assessment of the Short Internalized Homonegativity Scale in Homosexual and Bisexual Men in 38 European Countries: Results From the European MSM Internet Survey | J Sex Res                                       |   |                                                    |   |              |                                           | X | Nested model                                      | 33  | N/A | 130718 |
| Maltby J.            | The Development of a Quality of Life Scale for Informal Carers for Older Adults                                                                                                                           | Gerontol. Geriatr. Med.                         |   |                                                    | X | Separate CFA |                                           |   |                                                   | 2   | 2   | 295    |
| Akoto, Edward Osei   | Cross-cultural factorial validity of the academic motivation scale.                                                                                                                                       | Cross Cultural Management                       |   |                                                    |   |              |                                           | X | MGCFA                                             | 2   | 1   | 529    |
| Johnston, Claire S   | Validation of an adapted French form of the Career Adapt-Abilities Scale in four Francophone countries.                                                                                                   | Journal of Vocational Behavior                  |   |                                                    |   |              |                                           | X | MGCFA                                             | 4   | 1   | 1707   |
| Haroz E.E.           | Measuring Hope Among Children Affected by Armed Conflict: Cross-Cultural Construct Validity of the Children's Hope Scale                                                                                  | Assessment                                      |   |                                                    |   |              | Van Ommeren                               | X | MGCFA                                             | 3   | 3   | 1057   |
| Boivin J.            | The Fertility Quality of Life (FertiQoL) tool: Development and general psychometric properties                                                                                                            | Fertil. Steril.                                 | X | Cross-country expert panel, focus group discussion |   |              |                                           |   |                                                   | 5   | 1   | 1414   |
| Sorgente, Angela     | The Financial Identity Scale (FIS): A multinational validation and measurement invariance study among emerging adults.                                                                                    | International Journal of Behavioral Development |   |                                                    |   |              | Back and forth translation                | X | MGCFA                                             | 3   | 3   | 2411   |
| Wilson, Claire A     | Resiliency across cultures: A validation of the Resiliency Scale for Young Adults.                                                                                                                        | Journal of Psychoeducational Assessment         |   |                                                    |   |              | Expert translation                        | X | Nested model                                      | 2   | 2   | 548    |
| Cerin E.             | Sharing good NEWS across the world: developing comparable scores across 12 countries for the Neighborhood Environment Walkability Scale (NEWS)                                                            | BMC Public Health                               |   |                                                    | X | Separate CFA | Back and forth translation                |   |                                                   | 12  | N/A | 14305  |
| Coelho, Gabriel L. H | Optimism scale: Evidence of psychometric validity in two countries and correlations with personality.                                                                                                     | Personality and Individual Differences          |   |                                                    |   |              |                                           | X | MGCFA (MLR)                                       | 2   | N/A | 746    |
| Choi, Hyung-Min      | Hotel Environmental Management Initiative (HEMI) scale development.                                                                                                                                       | International Journal of Hospitality Management |   |                                                    | X | Separate CFA | Back and forth translation                | X | invariance test                                   | 2   | 2   | 595    |



|                     |                                                                                                                                                                             |                                                                                        |   |                                                                 |   |                               |                                           |   |                                     |    |     |            |
|---------------------|-----------------------------------------------------------------------------------------------------------------------------------------------------------------------------|----------------------------------------------------------------------------------------|---|-----------------------------------------------------------------|---|-------------------------------|-------------------------------------------|---|-------------------------------------|----|-----|------------|
| Hjemdal, Odin       | The cross-cultural validity of the Resilience Scale for Adults: a comparison between Norway and Brazil.                                                                     | BMC Psychol                                                                            |   |                                                                 |   |                               |                                           | X | MGCFA                               | 2  | 2   | 536        |
| Meng, Juan (Gloria) | Technology Readiness Index (TRI): Assessing cross-cultural validity.                                                                                                        | Journal of International Consumer Marketing                                            |   |                                                                 |   |                               | Back and forth translation                | X | MGCFA                               | 2  | 2   | 468        |
| Carrozzino D.       | Cross-cultural validity of the WHO-5 Well-Being Index and Euthymia Scale: A clinimetric analysis                                                                            | J. Affective Disord.                                                                   |   |                                                                 |   |                               |                                           | X | Mokken and Rasch analyses           | 5  | 5   | 3762       |
| Vaingankar J.A.     | Development of the Chinese, Malay and Tamil translations of the Positive Mental Health Instrument: Cross-cultural adaptation, validity and internal consistency             | Transcult. Psychiatry                                                                  |   |                                                                 |   |                               | Back and forth translation, expert review | X | DIF                                 | 1  | 3   | 660        |
| Ford, John B        | The cross-cultural scale development process: The case of brand-evoked nostalgia in Belgium and the United States.                                                          | Journal of Business Research                                                           |   |                                                                 |   |                               |                                           | X | MGCFA                               | 2  | N/A | 660        |
| Zanon, Cristian     | Validation of the Satisfaction with Life Scale to Brazilians: Evidences of measurement noninvariance across Brazil and US.                                                  | Social Indicators Research                                                             |   |                                                                 |   |                               | Back and forth translation                | X | MGCFA                               | 2  | 2   | 1629       |
| Sobral M.P.         | COMPI fertility problem stress scales is a brief, valid and reliable tool for assessing stress in patients seeking treatment                                                | Hum. Reprod.                                                                           |   |                                                                 |   |                               | Back and forth translation                | X | MGCFA                               | 7  | 7   | 3923       |
| Bloemeke J.         | Cross-cultural selection and validation of instruments to assess patient-reported outcomes in children and adolescents with achondroplasia                                  | Qual. Life Res.                                                                        | X | Literature based review, focus group discussion                 | X | Cognitive debriefing          |                                           |   |                                     | 2  | 2   | 133        |
| Jasielska, Dorota   | General trust scale: Validation in cross-cultural settings.                                                                                                                 | Current Psychology: A Journal for Diverse Perspectives on Diverse Psychological Issues |   |                                                                 |   |                               | Back and forth translation, expert review | X | MGCFA                               | 2  | 2   | 433        |
| Giromini L.         | Cross-Cultural Validation of the Rorschach Developmental Index                                                                                                              | J Pers Assess                                                                          |   |                                                                 |   |                               |                                           | X | Separate correlation in each sample | 2  | 2   | 902        |
| Aresi, Giovanni     | Development and validation of a Multidimensional Motivations to Study Abroad Scale (MMSAS) among European Credit Mobility Students.                                         | International Journal of Intercultural Relations                                       | X | Literature based review, pilot qualitative study, expert review | X | Separate CFA                  | Brislin                                   | X | MGCFA                               | 43 | 5   | 1333       |
| Chen, Yu-Ping       | Family role performance: Scale development and validation.                                                                                                                  | Applied Psychology: An International Review                                            | X | In-depth interview with cross-country sample                    | X | covariance structure approach | Back and forth translation                |   |                                     | 22 | 2   | 534        |
| Mezquita, Laura     | Preliminary validity and reliability evidence of the Brief Antisocial Behavior Scale (B-ABS) in young adults from four countries.                                           | PLoS ONE                                                                               |   |                                                                 |   |                               | Back and forth translation                | X | DIF                                 | 4  | 3   | 3188       |
| Schulze D.          | Comparative organizational research starts with sound measurement: Validity and invariance of Turker's corporate social responsibility scale in five cross-cultural samples | PLoS ONE                                                                               |   |                                                                 |   |                               | Back and forth translation                | X | MGCFA, BSEM                         | 3  | 2   | 1220       |
| Onwezen, Marleen C  | Development and cross-cultural validation of a shortened social representations scale of new foods.                                                                         | Food Quality and Preference                                                            |   |                                                                 | X | Separate CFA                  | Back and forth translation                |   |                                     | 3  | 3   | 1496       |
| Streib, Heinz       | The Religious Schema Scale: Construction and initial validation of a quantitative measure for religious styles.                                                             | International Journal for the Psychology of Religion                                   |   |                                                                 |   |                               | Back and forth translation                | X | MGCFA                               | 2  | 2   | 822        |
| Boer M.             | Cross-national validation of the social media disorder scale: findings from adolescents from 44 countries                                                                   | Addiction                                                                              |   |                                                                 |   |                               | Back and forth translation, expert review | X | MGCFA                               | 44 | N/A | 22253<br>2 |
| Shoychet, Gillian   | Assessing positive adaptation during a global crisis: The development and validation of the family positive adaptation during COVID-19 scale.                               | Front Psychol                                                                          |   |                                                                 |   |                               |                                           | X | MGCFA                               | 4  | 1   | 549        |

|                         |                                                                                                                                                                                              |                                                                                   |   |                                                 |   |                                                            |                                           |   |                        |    |     |      |
|-------------------------|----------------------------------------------------------------------------------------------------------------------------------------------------------------------------------------------|-----------------------------------------------------------------------------------|---|-------------------------------------------------|---|------------------------------------------------------------|-------------------------------------------|---|------------------------|----|-----|------|
| Ruan, Jiening           | Cross-cultural validation of Teachers' Sense of Efficacy Scale in three Asian countries: Test of measurement invariance.                                                                     | Journal of Psychoeducational Assessment                                           |   |                                                 | X | Separate CFA                                               | Back and forth translation                | X | MGCFA                  | 3  | 3   | 489  |
| Partsch, Melanie V      | Measuring self-control in international large-scale surveys: Development and validation of a four-item scale in English, French, German, Japanese, Polish, and Spanish.                      | European Journal of Psychological Assessment                                      |   |                                                 |   |                                                            | TRAPD approach                            | X | MGCFA                  | 6  | 6   | 5557 |
| Villiers-Tuthill A.     | Development and Validation of a Cross-Country Hospital Patient Quality of Care Assessment Tool in Europe                                                                                     | Patient                                                                           | X | Focus group, expert panel                       |   |                                                            | Back and forth translation                |   |                        | 7  | 7   | 531  |
| Napolitano C.M.         | Assessing the implicit theory of willpower for strenuous mental activities scale: Multigroup, across-gender, and cross-cultural measurement invariance and convergent and divergent validity | Psychol. Assess.                                                                  |   |                                                 |   |                                                            | Two independent translation               | X | MGCFA                  | 3  | 3   | 2781 |
| Cleveland, Mark         | Cross-linguistic validation of a unidimensional scale for cosmopolitanism.                                                                                                                   | Journal of Business Research                                                      |   |                                                 |   |                                                            |                                           | X | MGCFA                  | 4  | 7   | 1538 |
| Komissarouk, Svetlana   | Dispositional differences in seeking autonomy- or dependency-oriented help: Conceptual development and scale validation.                                                                     | Personality and Individual Differences                                            |   |                                                 | X | Separate CFA                                               | Back and forth translation                |   |                        | 3  | 3   | 486  |
| Fischmann, Gabriel      | Validation of a short and generic Qualitative Job Insecurity Scale (QUAL-JIS).                                                                                                               | European Journal of Psychological Assessment                                      |   |                                                 |   |                                                            |                                           | X | MGCFA                  | 2  | 2   | 2380 |
| Eisma M.C.              | Development and psychometric evaluation of the Utrecht grief rumination scale                                                                                                                | J. Psychopathol. Behav. Assess.                                                   |   |                                                 | X | Separate CFA                                               | Back and forth translation                | X | MGCFA                  | 2  | 2   | 520  |
| Chow T.S.               | Family Resilience Scale Short Form (FRS16): Validation in the US and Chinese Samples                                                                                                         | Front. Psychiatry                                                                 |   |                                                 | X | Separate CFA                                               |                                           | X | MGCFA                  | 2  | 2   | 2371 |
| Afulani P.A.            | Toward the development of a short multi-country person-centered maternity care scale                                                                                                         | Int. J. Gynecol. Obstet.                                                          |   |                                                 | X | Separate CFA                                               |                                           |   |                        | 3  | 6   | 3663 |
| Nackers F.              | A screening tool for psychological difficulties in children aged 6 to 36 months: Cross-cultural validation in Kenya, Cambodia and Uganda                                                     | BMC Pediatr.                                                                      | X | Cross-cultural expert panel                     | X | Separate EFA for each dataset                              | Back and forth translation, expert review |   |                        | 3  | 3   | 824  |
| Caycho-Rodriguez, Tomas | Cross-cultural validation of the new version of the Coronavirus Anxiety Scale in twelve Latin American countries.                                                                            | Curr Psychol                                                                      |   |                                                 | X | Separate CFA                                               |                                           | X | MGCFA                  | 12 | 1   | 5196 |
| Pepe, Silvia J          | Work Self-Efficacy Scale and Search for Work Self-Efficacy Scale: A validation study in Spanish and Italian cultural contexts.                                                               | Revista de Psicología del Trabajo y de las Organizaciones                         |   |                                                 |   |                                                            |                                           | X | MGCFA                  | 2  | 2   | 658  |
| Reyes-Bossio, Mario     | Cross-cultural validity of the five items Mindful Attention Awareness Scale (MAAS-5) in Peru and Mexico during the COVID-19 pandemic.                                                        | Psicol. reflex. crit.                                                             |   |                                                 |   |                                                            |                                           | X | MGCFA                  | 2  | 2   | 1144 |
| Whiting-Collins L.      | Measuring contraceptive self-efficacy in sub-Saharan Africa: development and validation of the CSESSA scale in Kenya and Nigeria                                                             | Contraception X                                                                   | X | Literature based review, focus group discussion | X | Separate PCA, reliability and validity test in each sample |                                           |   |                        | 2  | 6   | 728  |
| Schutte, Lusilda        | Problematic factorial validity of three language versions of the Basic Psychological Needs Scale (BPNS): Why and what are the implications?                                                  | Journal of Happiness Studies: An Interdisciplinary Forum on Subjective Well-Being |   |                                                 | X | Separate CFA                                               |                                           | X | MGCFA                  | 1  | 3   | 1056 |
| Louis J.P.              | The Development of the Love and Respect Marriage Scale                                                                                                                                       | J Sex Marital Ther                                                                |   |                                                 |   |                                                            |                                           | X | MGCFA                  | 5  | N/A | 1856 |
| Khan, Anzalee           | A rasch model to test the cross-cultural validity in the positive and negative syndrome scale (PANSS) across six geo-cultural groups.                                                        | BMC Psychol                                                                       |   |                                                 |   |                                                            |                                           | X | Rasch analysis and DIF | 27 | N/A | 1169 |

|                  |                                                                                                                                                       |                                                                                        |  |  |   |              |                            |   |       |   |   |      |
|------------------|-------------------------------------------------------------------------------------------------------------------------------------------------------|----------------------------------------------------------------------------------------|--|--|---|--------------|----------------------------|---|-------|---|---|------|
| Heikamp, Tobias  | Cross-cultural validation of the positivity-scale in five European countries.                                                                         | Personality and Individual Differences                                                 |  |  |   |              | Back and forth translation | X | MGCFA | 5 | 5 | 3544 |
| Goroshit, Marina | Life-domain regret regarding procrastination (LDR-P): Scale validation in the United States and Israel.                                               | Current Psychology: A Journal for Diverse Perspectives on Diverse Psychological Issues |  |  | X | Separate CFA | Back and forth translation | X | MGCFA | 2 | 2 | 3197 |
| Li J.-B.         | The Parent-Version of the Spence Children's Anxiety Scale (SCAS-P) in Chinese and Italian Community Samples: Validation and Cross-Cultural Comparison | Child Psychiatry Hum Dev                                                               |  |  |   |              |                            | X | MGCFA | 2 | 2 | 908  |

## Appendix S4. Commonly used indices for CFA and MGCFAs

### For CFA

| title                                                                                                                                                                                                                | CFI    | RMSEA  | SRMR   | TFI   |
|----------------------------------------------------------------------------------------------------------------------------------------------------------------------------------------------------------------------|--------|--------|--------|-------|
| The Good Mothering Expectations Scale: An international instrument development study.                                                                                                                                |        |        |        |       |
| Cross-cultural search for Big Five: Development of a scale to compare personality traits of pre-service elementary school teachers in Turkey and Spain.                                                              | >0.90  | <0.08  | <0.08  |       |
| Stress measurement among charge nurses: developing a cross-cultural tool                                                                                                                                             | >0.90  | <0.08  |        |       |
| The development of the Compulsive Sexual Behavior Disorder Scale (CSBD-19): An ICD-11 based screening measure across three languages                                                                                 | >=0.90 | <=0.08 |        |       |
| Development and cross-cultural validation of the Goal Content for Weight Maintenance Scale (GCWMS)                                                                                                                   | >0.90  | <0.05  | <0.05  |       |
| The Evidence-based Practice Attitude Scale-36 (EBPAS-36): a brief and pragmatic measure of attitudes to evidence-based practice validated in US and Norwegian samples                                                | >0.95  | <0.06  | <0.08  |       |
| The Positive Eating Scale: Relationship with objective health parameters and validity in Germany, the USA and India.                                                                                                 | >=0.90 | <=0.08 | <=0.10 |       |
| Development and structural validation of a shortened version of the Participation Scale                                                                                                                              | >0.95  | <0.08  |        | >0.95 |
| Death-Related Status Consumption: Scale Development and Validation                                                                                                                                                   |        |        |        |       |
| Humane orientation as a new cultural dimension of the GLOBE project: A validation study of the GLOBE Scale and out-group humane orientation in 25 countries.                                                         |        |        |        | >0.90 |
| Stress-symptoms and well-being in children and adolescents: Factor structure, measurement invariance, and validity of English, French, German, Russian, Spanish, and Ukrainian language versions of the SSKJ scales. | >=0.95 | <=0.06 | <=0.08 |       |
| Measuring Prosocial Behaviors: Psychometric Properties and Cross-National Validation of the Prosociality Scale in Five Countries.                                                                                    | >0.90  | <0.08  |        | >0.90 |
| The Development of a Quality of Life Scale for Informal Carers for Older Adults                                                                                                                                      | >=0.90 | <0.08  | <0.08  |       |
| Sharing good NEWS across the world: developing comparable scores across 12 countries for the Neighborhood Environment Walkability Scale (NEWS)                                                                       | >=0.90 | <=0.06 | <=0.08 |       |
| Hotel Environmental Management Initiative (HEMI) scale development.                                                                                                                                                  |        |        |        |       |
| Development and validation of a Multidimensional Motivations to Study Abroad Scale (MMSAS) among European Credit Mobility Students.                                                                                  | >0.90  | <0.08  | <0.08  |       |
| Development and cross-cultural validation of a shortened social representations scale of new foods.                                                                                                                  | >=0.95 | <=0.06 | <=0.08 |       |
| Cross-cultural validation of Teachers' Sense of Efficacy Scale in three Asian countries: Test of measurement invariance.                                                                                             | >0.95  | <0.05  | <0.08  |       |
| Dispositional differences in seeking autonomy- or dependency-oriented help: Conceptual development and scale validation.                                                                                             | >=0.95 | <=0.07 |        |       |
| Development and psychometric evaluation of the Utrecht grief rumination scale                                                                                                                                        | >0.90  | <=0.08 |        | >0.90 |
| Family Resilience Scale Short Form (FRS16): Validation in the US and Chinese Samples                                                                                                                                 |        |        |        |       |
| Toward the development of a short multi-country person-centered maternity care scale                                                                                                                                 |        |        |        |       |
| Cross-cultural validation of the new version of the Coronavirus Anxiety Scale in twelve Latin American countries.                                                                                                    | >0.95  | <0.08  | <0.08  | >0.90 |

|                                                                                                                                             |        |       |  |  |
|---------------------------------------------------------------------------------------------------------------------------------------------|--------|-------|--|--|
| Problematic factorial validity of three language versions of the Basic Psychological Needs Scale (BPNS): Why and what are the implications? | >=0.95 | <0.08 |  |  |
| Life-domain regret regarding procrastination (LDR-P): Scale validation in the United States and Israel.                                     |        |       |  |  |

### For MGCF

| title                                                                                                                                                   | Min sample in sub-group | $\Delta$ CFI | $\Delta$ RMSEA | $\Delta$ SRMR for metric | $\Delta$ SRMR for scalar | $\Delta$ TLI | $\Delta$ NCL | Other |
|---------------------------------------------------------------------------------------------------------------------------------------------------------|-------------------------|--------------|----------------|--------------------------|--------------------------|--------------|--------------|-------|
| Why do people use new psychoactive substances? Development of a new measurement tool in six European countries                                          | 272                     | <0.01        | <0.015         |                          |                          |              |              |       |
| Development and validation of a health and nutrition module for the project-level Women's Empowerment in Agriculture Index (pro-WEAI+HN)                |                         |              |                |                          |                          |              |              |       |
| Going your own way: A cross-cultural validation of the Motivational Demands at Work Scale (mind@work).                                                  | 308                     |              |                |                          |                          |              |              |       |
| A cross-cultural validation of the Resiliency Scale for Young Adults in Canada and China                                                                | 617                     | $\leq 0.005$ | $\leq 0.01$    |                          |                          |              |              |       |
| Psychometric validity and measurement invariance of the caring for Bliss Scale in the Philippines and the United States                                 | 546                     | <0.01        | <0.015         |                          |                          |              |              |       |
| Cross cultural validation of the Yale Food Addiction Scale 2.0 and evaluation of food addiction in Hispanic bariatric surgery-seeking patients.         | 215                     |              |                |                          |                          |              |              |       |
| Testing the Situationism Scale in Europe: Scale validation, self-regulation and regional differences                                                    | 62                      |              |                |                          |                          |              |              |       |
| Examining the validity, reliability, and measurement invariance of the Social Support for Exercise Scale among Spanish- and English-language Hispanics. | 369                     | $\leq 0.01$  | <0.01          | <0.025                   | <0.005                   |              |              |       |
| Perceived collective efficacy to stop aggression at school: A validation of an Italian and a Swedish version of a scale for adolescents.                | 126                     |              |                |                          |                          |              |              |       |
| Measuring parental anchoring: The development and validation of the Parental Anchoring Scale.                                                           | 172                     |              |                |                          |                          |              |              |       |
| Cross-cultural measurement invariance in the Satisfaction with Food-Related Life Scale in older adults from two developing countries.                   | 840                     |              |                |                          |                          |              |              |       |
| Cross-cultural validation of the Worries about COVID-19 and its consequences Scale (W-COV) in adolescents and young people                              | 334                     | <0.01        | <0.015         | <0.03                    |                          |              |              |       |
| Measurement invariance of English and French Health Education Impact Questionnaire (heiQ) empowerment scales validated for cancer                       | 520                     | <0.01        | $\leq 0.015$   |                          |                          |              |              |       |
| Consumer arrogance: Scale development and validation.                                                                                                   | 149                     |              |                |                          |                          |              |              |       |
| The Multidimensional Work Motivation Scale: Validation evidence in seven languages and nine countries.                                                  | 530                     | $\leq 0.01$  |                |                          |                          |              |              |       |



|                                                                                                                                                                                                                      |       |        |         |       |        |  |        |                   |
|----------------------------------------------------------------------------------------------------------------------------------------------------------------------------------------------------------------------|-------|--------|---------|-------|--------|--|--------|-------------------|
| Cross-cultural validation of the short version of the Food Disgust Scale in ten countries                                                                                                                            | 572   | <=0.01 | <=0.015 |       |        |  |        |                   |
| Development and validation of the Leadership Effectiveness in Africa and the Diaspora (LEAD) Scale.                                                                                                                  | 441   | <=0.01 |         |       |        |  |        | $\chi^2$          |
| International differences in employee silence motives: Scale validation, prevalence, and relationships with culture characteristics across 33 countries.                                                             | 157   | <=0.01 | <=0.015 |       |        |  |        | $\chi^2$          |
| Measuring Italian resilience: Cross-cultural validity and psychometric properties of the Essential Resilience Scale in Italian and Canadian contexts.                                                                | 500   | <=0.01 | <=0.015 |       |        |  |        |                   |
| The Basic Psychological Need Satisfaction and Need Frustration at Work Scale: A Validation Study.                                                                                                                    | 281   | <0.01  | <0.015  | <0.03 | <0.015 |  |        |                   |
| Stress-symptoms and well-being in children and adolescents: Factor structure, measurement invariance, and validity of English, French, German, Russian, Spanish, and Ukrainian language versions of the SSKJ scales. | 207   | <=0.01 |         |       |        |  | <=0.02 |                   |
| Measuring Prosocial Behaviors: Psychometric Properties and Cross-National Validation of the Prosociality Scale in Five Countries.                                                                                    | 116   | <=0.01 |         |       |        |  |        |                   |
| Employee well-being in organizations: Theoretical model, scale development, and cross-cultural validation.                                                                                                           | 250   |        |         |       |        |  |        |                   |
| A cross-cultural validation of the Learning-Related Boredom Scale (LRBS) with Canadian and Chinese college students.                                                                                                 | 151   | <=0.01 |         |       |        |  |        | $\chi^2$          |
| A cross-national validation of the Short Employment Hope Scale (EHS-14) in the United States and South Korea.                                                                                                        | 390   |        |         |       |        |  |        | $\chi^2$          |
| Factorial validity, cross-cultural equivalence, and latent means examination of the Organizational Career Growth scale in Italy and China.                                                                           | 256   | <=0.01 | <=0.015 |       |        |  |        |                   |
| A contribution toward the adaptation and validation of the entrepreneurial self-efficacy scale in Italy and Portugal.                                                                                                | 123   | <=0.01 | <=0.015 |       |        |  |        |                   |
| The Individual Water Insecurity Experiences (IWISE) Scale: Reliability, equivalence and validity of an individual-level measure of water security                                                                    | 878   | <=0.01 | <=0.02  |       |        |  |        | Alignment methods |
| Cross-cultural validity of the self-stigma of seeking help (SSOSH) scale: Examination across six nations                                                                                                             | 299   | <=0.02 |         |       |        |  |        |                   |
| Revision, criterion validity, and multigroup assessment of the reactions to homosexuality scale                                                                                                                      | 733   | <=0.01 |         |       |        |  |        |                   |
| Validation of the revised Compound PsyCap Scale (CPC-12R) and its measurement invariance across the US and Germany.                                                                                                  | 202   | <0.01  | <0.015  | <0.03 | <0.015 |  |        |                   |
| Assessing the cross-cultural validity of the Succession, Identity and Consumption (SIC) Scale across four French-speaking countries.                                                                                 | 385   | <=0.01 |         |       |        |  |        |                   |
| Structural Validation and Multiple Group Assessment of the Short Internalized Homonegativity Scale in Homosexual and Bisexual Men in 38 European Countries: Results From the European MSM Internet Survey            | 10490 | <=0.01 | <=0.015 |       |        |  |        |                   |
| Cross-cultural factorial validity of the academic motivation scale.                                                                                                                                                  | 262   | <=0.01 |         |       |        |  |        |                   |

|                                                                                                                                                                             |      |             |              |             |        |  |  |                   |
|-----------------------------------------------------------------------------------------------------------------------------------------------------------------------------|------|-------------|--------------|-------------|--------|--|--|-------------------|
| Validation of an adapted French form of the Career Adapt-Abilities Scale in four Francophone countries.                                                                     | 181  | <0.01       | <0.05        |             |        |  |  |                   |
| Measuring Hope Among Children Affected by Armed Conflict: Cross-Cultural Construct Validity of the Children's Hope Scale                                                    | 325  |             |              |             |        |  |  | $\chi^2$          |
| The Financial Identity Scale (FIS): A multinational validation and measurement invariance study among emerging adults.                                                      | 481  | <0.01       | <0.015       |             |        |  |  |                   |
| Resiliency across cultures: A validation of the Resiliency Scale for Young Adults.                                                                                          | 259  |             |              |             |        |  |  | $\chi^2$          |
| Optimism scale: Evidence of psychometric validity in two countries and correlations with personality.                                                                       | 325  | $\leq 0.01$ |              | $\leq 0.03$ |        |  |  |                   |
| The cross-cultural validity of the Resilience Scale for Adults: a comparison between Norway and Brazil.                                                                     | 222  |             |              |             |        |  |  |                   |
| Technology Readiness Index (TRI): Assessing cross-cultural validity.                                                                                                        | 231  |             |              |             |        |  |  | $\chi^2$          |
| The cross-cultural scale development process: The case of brand-evoked nostalgia in Belgium and the United States.                                                          | 188  |             |              |             |        |  |  |                   |
| Validation of the Satisfaction with Life Scale to Brazilians: Evidences of measurement noninvariance across Brazil and US.                                                  | 241  |             |              |             |        |  |  | $\chi^2$          |
| COMPI fertility problem stress scales is a brief, valid and reliable tool for assessing stress in patients seeking treatment                                                | 96   | <0.01       | <0.015       |             |        |  |  |                   |
| General trust scale: Validation in cross-cultural settings.                                                                                                                 | 203  |             |              |             |        |  |  | Alignment methods |
| Development and validation of a Multidimensional Motivations to Study Abroad Scale (MMSAS) among European Credit Mobility Students.                                         | 83   | $\leq 0.01$ | $\leq 0.015$ |             |        |  |  |                   |
| Comparative organizational research starts with sound measurement: Validity and invariance of Turker's corporate social responsibility scale in five cross-cultural samples | 146  | <0.01       | <0.015       | <0.03       | <0.005 |  |  |                   |
| The Religious Schema Scale: Construction and initial validation of a quantitative measure for religious styles.                                                             | 255  |             |              |             |        |  |  | $\chi^2$          |
| Cross-national validation of the social media disorder scale: findings from adolescents from 44 countries                                                                   |      | $\leq 0.01$ | $\leq 0.015$ |             |        |  |  |                   |
| Assessing positive adaptation during a global crisis: The development and validation of the family positive adaptation during COVID-19 scale.                               | 136  |             |              |             |        |  |  | $\chi^2$          |
| Cross-cultural validation of Teachers' Sense of Efficacy Scale in three Asian countries: Test of measurement invariance.                                                    | 879  | <0.01       | <0.015       | <0.03       | <0.01  |  |  |                   |
| Measuring self-control in international large-scale surveys: Development and validation of a four-item scale in English, French, German, Japanese, Polish, and Spanish.     | 1144 | <0.01       |              |             |        |  |  | $\chi^2$          |



|                                                                                                                                                                                              |      |             |              |  |  |  |  |          |
|----------------------------------------------------------------------------------------------------------------------------------------------------------------------------------------------|------|-------------|--------------|--|--|--|--|----------|
| Assessing the implicit theory of willpower for strenuous mental activities scale: Multigroup, across-gender, and cross-cultural measurement invariance and convergent and divergent validity | 302  |             |              |  |  |  |  | $\chi^2$ |
| Cross-linguistic validation of a unidimensional scale for cosmopolitanism.                                                                                                                   | 388  | $\leq 0.01$ | $\leq 0.015$ |  |  |  |  |          |
| Validation of a short and generic Qualitative Job Insecurity Scale (QUAL-JIS).                                                                                                               | 204  |             |              |  |  |  |  | $\chi^2$ |
| Development and psychometric evaluation of the Utrecht grief rumination scale                                                                                                                | 1135 | $\leq 0.01$ | $\leq 0.015$ |  |  |  |  |          |
| Family Resilience Scale Short Form (FRS16): Validation in the US and Chinese Samples                                                                                                         | 163  |             |              |  |  |  |  | $\chi^2$ |
| Cross-cultural validation of the new version of the Coronavirus Anxiety Scale in twelve Latin American countries.                                                                            | 253  | $\leq 0.01$ | $\leq 0.015$ |  |  |  |  | $\chi^2$ |
| Work Self-Efficacy Scale and Search for Work Self-Efficacy Scale: A validation study in Spanish and Italian cultural contexts.                                                               | 203  |             |              |  |  |  |  | $\chi^2$ |
| Cross-cultural validity of the five items Mindful Attention Awareness Scale (MAAS-5) in Peru and Mexico during the COVID-19 pandemic.                                                        | 322  | $< 0.01$    |              |  |  |  |  |          |
| Problematic factorial validity of three language versions of the Basic Psychological Needs Scale (BPNS): Why and what are the implications?                                                  | 256  | $\leq 0.01$ | $\leq 0.015$ |  |  |  |  |          |
| The Development of the Love and Respect Marriage Scale                                                                                                                                       | 306  |             |              |  |  |  |  | $\chi^2$ |
| Cross-cultural validation of the positivity-scale in five European countries.                                                                                                                | 320  | $\leq 0.01$ |              |  |  |  |  | $\chi^2$ |
| Life-domain regret regarding procrastination (LDR-P): Scale validation in the United States and Israel.                                                                                      | 897  | $\leq 0.01$ |              |  |  |  |  |          |
| The Parent-Version of the Spence Children's Anxiety Scale (SCAS-P) in Chinese and Italian Community Samples: Validation and Cross-Cultural Comparison                                        | 452  | $< 0.01$    |              |  |  |  |  |          |
